# Supplementary material for: Genomic characterization of endemic diarrheagenic Escherichia coli and Escherichia albertii from infants with diarrhea in Vietnam
Source: PLoS Negl Trop Dis. 2023 Apr 4;17(4):e0011259. doi: 10.1371/journal.pntd.0011259 (PMC10104362; doi:10.1371/journal.pntd.0011259)
Supplement: S2 Table — (XLSX) [file pntd.0011259.s002.xlsx]

## Sheet: S2 Table
S2 Table. List of diarrheagenic Escherichia coli (DEC) and E. albertii used in this study and details of analysis results
Strain ID	Seq name	Date	Age (m)	Accession no.	Assemble (platanus_B v1.2.1) (>300 bp)				CheckM			EIEC	STEC		EPEC	ETEC		EAEC	2nd set of virulence related genes					Phylogroup	Sequence type (ST)	pathotype	DNA-based serotype (Og:Hg)	eae-subtype	beta-lactam				aminoglycoside									macrolide						phenicol
					Total scaffold length	No. of scaffold	longest scaffold length (bp)	coverage	Marker lineage	Completeness	Contamination	ipaH	stx1	stx2	eae	lt	st	aggR	hylA	astA	invx	set1A	cdtB						CMY	CTX-M	OXA	TEM***	aac(3)	aac(6')	ant(2'')	ant(3'')	aph(3')	aph4	sat	strA	strB	ermB	linG	lnuF	mefB	mphA	mphB	catA	catBx
ECV11	ECV11	2012-12-13	1	DRR415709	4880552	93	546428	37.8218	f__Enterobacteriaceae	99.56	0.23	-	-	-	+	-	-	-	.	.	.	.	.	B1	517	EPEC	Og45:Hg19	epsilon2	-	-	-	-	-	-	-	-	-	-	-	-	-	-	-	-	-	-	mphB.v2_2176*?	-	-
ECV15-3	VNDC0015	2012-12-14	11	DRR415710	5413627	286	202081	84.0461	f__Enterobacteriaceae	99.97	0.62	-	-	-	-	-	-	+	.	.	.	+	.	D	31	EAEC	Og130:Hg27		-	CTX-M-55_578	-	TEM-105*	aac3-IIa.v1_12*	-	-	aadA5_114	-	-	-	-	-	-	-	-	-	mphA_2174	mphB.v2_2176*?	catA1_2229*	-
ECV23-2	VNDC0023	2012-12-18	6	DRR415711	5234197	195	142539	57.8197	f__Enterobacteriaceae	99.62	0.36	-	-	-	-	-	-	+	.	+	.	+	.	B1	40	EAEC	OgGp4:Hg21		-	CTX-M-15_530	-	TEM-105*	aac3-IId_16*	-	-	aadA5_114	-	-	-	-	-	ermB.v1_2136*?	-	-	-	mphA_2174	mphB.v2_2176*	-	-
ECV37	ECV37	2012-12-24	8	DRR415712	5272134	179	352130	46.1779	f__Enterobacteriaceae	99.17	0.3	-	-	-	-	-	-	+	.	+	.	+	.	B1	200	EAEC	Og175:Hg31		-	-	-	TEM-105*	-	-	-	aadA5_114	-	-	-	-	-	-	-	-	-	mphA_2174	mphB.v2_2176*	-	-
ECV39	ECV39	2012-12-24	16	DRR415713	4919539	272	176766	47.111	f__Enterobacteriaceae	98.78	0.19	-	-	-	+	-	-	-	.	.	.	.	.	A	378	EPEC	OgGp5:Hg33	iota2	-	-	-	TEM-105*	aac3-IId_16*	-	-	aadA5_114	-	-	-	strA.v1_2409*	strB.v1_2410*	-	-	-	-	mphA_2174	mphB.v2_2176*	-	-
ECV149	ECV149	2013-02-04	7	DRR415714	5084944	133	338317	52.9828	f__Enterobacteriaceae	99.59	0.14	-	-	-	-	-	-	+	.	+	.	+	.	B1	678	EAEC	Og104:Hg4		-	-	-	-	-	-	-	-	-	-	-	-	-	-	-	-	-	-	mphB.v2_2176*?	-	-
ECV231	VNDC0231	2013-03-15	16	DRR415715	5214906	212	241900	72.7702	f__Enterobacteriaceae	99.62	0.1	-	-	-	+	-	-	-	.	.	.	.	.	B1	328	EPEC	OgUT:Hg7	beta1	CMY-2.v2_399	-	-	TEM-105*	-	-	-	-	-	-	-	strA.v1_2409*	strB.v1_2410*	-	-	-	-	-	mphB.v2_2176*?	catII.2_2252*	-
ECV282	ECV282	2013-04-09	5	DRR415716	5362503	296	230145	67.6371	f__Enterobacteriaceae	99.97	0.83	-	-	-	+	-	-	-	.	+	.	.	.	A	10	EPEC	OgGp7:Hg16	epsilon1	-	CTX-M-27_549	-	TEM-104	aac3-IId_16*	-	ant2''-Ia_92	aadA5_114	-	-	-	strA.v1_2409*	strB.v1_2410*	ermB.v1_2136*	-	-	-	mphA_2174	mphB.v2_2176*	-	-
ECV283	ECV283	2013-04-09	3	DRR415717	5098295	161	298513	56.1789	f__Enterobacteriaceae	99.97	0.04	-	-	-	+	-	-	-	.	+	.	.	.	A	10	EPEC	OgGp7:Hg16	epsilon1	-	-	-	TEM-104	aac3-IId_16*	-	-	aadA5_114	-	-	-	strA.v1_2409*	strB.v1_2410*	-	-	-	-	mphA_2174	mphB.v2_2176*	-	-
ECV284	ECV284	2013-04-09	14	DRR415718	5960161	568	176423	50.1967	f__Enterobacteriaceae	99.84	4.84	-	-	-	+	-	-	-	.	+	.	.	.	A	10	EPEC	OgGp7:Hg16	epsilon1+kappa	-	-	OXA-10_1000	TEM-104	aac3-IId_16*	-	-	aadA5_114	aph3-Ia.v1_165*	-	-	strA.v1_2409*	strB.v1_2410*	-	-	-	mefB_2098	mphA_2174	mphB.v2_2176*	-	-
ECV285	ECV285	2013-04-09	43	DRR415719	5089296	153	298396	64.1988	f__Enterobacteriaceae	99.97	0.04	-	-	-	+	-	-	-	.	+	.	.	.	A	10	EPEC	OgGp7:Hg16	epsilon1	-	-	-	TEM-104	aac3-IId_16*	-	-	aadA5_114	-	-	-	strA.v1_2409*	strB.v1_2410*	-	-	-	-	mphA_2174	mphB.v2_2176*	-	-
ECV286	ECV286	2013-04-09	43	DRR415720	4917397	211	173196	35.996	f__Enterobacteriaceae	98.78	0.33	-	-	-	+	-	-	-	.	.	.	.	.	A	206	EPEC	Og49:Hg10	kappa	-	-	-	-	-	-	-	aadA24_108*?	aph3-Ia.v1_165*	-	-	-	-	-	-	-	mefB_2098	-	mphB.v2_2176*	-	-
ECV457	ECV457	2013-05-15	16	DRR415721	5170192	137	413115	40.3013	f__Enterobacteriaceae	99.52	0.36	-	-	-	-	-	-	+	.	.	.	+	.	B1	3570	EAEC	OgL19:Hg27		-	-	-	TEM-105*	-	-	-	-	-	-	-	-	-	-	-	-	-	mphA_2174	mphB.v2_2176*	-	-
ECV463	ECV463	2013-05-29	2	DRR415722	5085482	104	412276	56.4128	f__Enterobacteriaceae	99.59	0.25	-	-	-	-	-	-	+	.	.	.	+	.	B1	3570	EAEC	OgX13:Hg27		-	-	-	TEM-105*	-	-	-	-	-	-	-	-	-	-	-	-	-	-	mphB.v2_2176*	catA1_2229*	-
ECV340	ECV340	2013-07-10	10	DRR415723	5015388	136	559870	53.1556	f__Enterobacteriaceae	99.97	0.16	-	-	-	-	+	+	-	.	+	.	.	.	B1	155	ETEC	OgUT:Hg21		-	-	-	-	-	-	-	-	-	-	-	-	-	-	-	-	-	-	mphB.v2_2176*	-	-
ECV371	ECV371	2013-07-12	5	DRR415724	4938182	566	89301	64.0131	f__Enterobacteriaceae	92.6	0.16	+	-	-	-	-	-	-	.	.	+	.	.	unclassified	152	EIEC	OgUT:Hg16		-	-	-	-	-	-	-	aadA_93*	-	-	sat-2_193	strA.v1_2409*	strB.v1_2410	-	-	-	-	-	mphB.v2_2176*	-	-
ECV425	ECV425	2013-08-01	6	DRR415725	5026338	139	600678	68.5872	f__Enterobacteriaceae	99.97	0.39	+	-	-	-	+	+	-	.	+	.	.	.	B1	155	ETEC/EIEC	OgUT:Hg21		-	-	-	-	-	-	-	-	-	-	sat-2_193*?	-	-	-	-	-	-	-	mphB.v2_2176*	-	-
ECV430.2	VNDC0430	2013-08-07	4	DRR415726	5248633	259	193271	79.8578	f__Enterobacteriaceae	99.62	0.2	-	-	-	+	-	-	-	.	.	.	.	.	B1	40	EPEC	Og115:Hg21	theta	-	-	-	TEM-105*	-	-	-	-	-	-	-	strA.v1_2409*	strB.v1_2410*	-	-	-	-	-	mphB.v2_2176*	-	-
ECV465	ECV465	2013-08-08	6	DRR415727	5015277	116	406260	50.8738	f__Enterobacteriaceae	99.93	0.25	-	-	-	-	-	-	+	.	.	.	+	.	B1	3570	EAEC	OgX13:Hg27		-	-	-	TEM-105*	-	-	-	-	-	-	-	-	-	-	-	-	-	-	mphB.v2_2176*	catA1_2229*	-
ECV467	ECV467	2013-08-09	15	DRR415728	4993593	95	410589	40.9451	f__Enterobacteriaceae	99.62	0.25	-	-	-	-	-	-	+	.	.	.	+	.	B1	3570	EAEC	OgX13:Hg27		-	-	-	TEM-105*	-	-	-	-	-	-	-	-	-	-	-	-	-	-	mphB.v2_2176*	catA1_2229*	-
ECV481-2	ECV481-2	2013-08-20	14	DRR415729	5265592	100	417152	37.8547	f__Enterobacteriaceae	99.97	0.62	-	-	-	-	-	-	+	.	.	.	+	.	D	31	EAEC	Og130:Hg27		-	-	-	TEM-105*	aac3-IIa.v1_12*	-	-	aadA_93*	-	-	-	-	-	-	-	-	-	mphA_2174	-	catA1_2229*	-
ECV482	ECV482	2013-08-22	6	DRR415730	5265140	109	535583	45.1719	f__Enterobacteriaceae	99.59	0.72	-	-	-	-	-	-	+	.	.	.	+	.	D	31	EAEC	Og130:Hg27		-	-	-	TEM-105*	aac3-IIe_17*	-	-	aadA_93	-	-	-	-	-	-	-	-	-	mphA_2174	mphB.v2_2176*?	catA1_2229*	-
ECV494	ECV494	2013-09-09	7	DRR415731	5012093	99	410517	59.6229	f__Enterobacteriaceae	99.62	0.25	-	-	-	-	-	-	+	.	.	.	+	.	B1	3570	EAEC	OgX13:Hg27		-	-	-	TEM-105*	-	-	-	-	-	-	-	-	-	-	-	-	-	-	mphB.v2_2176*	catA1_2229*	-
ECV523-4	ECV523-4	2013-10-02	7	DRR415732	4639837	531	74846	41.7152	f__Enterobacteriaceae	97.66	0.62	+	-	-	-	-	-	-	.	.	.	.	.	unclassified	152	EIEC	OgUT:Hg16		-	-	-	-	-	-	-	aadA_93*	-	-	sat-2_193	strA.v1_2409*	strB.v1_2410	-	-	-	-	-	mphB.v2_2176*	-	-
ECV539-1	ECV539-1	2013-10-02	29	DRR415733	5402576	149	300969	32.4165	f__Enterobacteriaceae	99.61	1.11	-	-	-	-	-	-	+	.	.	.	+	.	D	31	EAEC	Og130:Hg27		-	CTX-M-55_578	-	TEM-105*	aac3-IIa.v1_12*	-	-	aadA_93	-	-	-	-	-	-	-	-	-	mphA_2174	-	catA1_2229*	-
ECV519-1	ECV519-1	2013-10-03	55	DRR415734	5392606	151	301483	52.3414	f__Enterobacteriaceae	99.83	1.4	-	-	-	-	-	-	+	.	.	.	+	.	D	31	EAEC	Og130:Hg27		-	CTX-M-55_578	-	TEM-105*	aac3-IIa.v1_12*	-	-	aadA_93	-	-	-	-	-	-	-	-	-	mphA_2174	mphB.v2_2176*?	catA1_2229*	-
ECV521-4	ECV521-4	2013-10-03	3	DRR415735	5408293	153	381748	42.4815	f__Enterobacteriaceae	99.97	1.11	-	-	-	-	-	-	+	.	.	.	+	.	D	31	EAEC	Og130:Hg27		-	CTX-M-55_578	-	TEM-105*	aac3-IIa.v1_12*	-	-	aadA_93	-	-	-	-	-	-	-	-	-	mphA_2174	mphB.v2_2176*?	catA1_2229*	-
ECV525-1	ECV525-1	2013-10-08	12	DRR415736	4879110	77	704734	43.332	f__Enterobacteriaceae	99.28	0.26	-	-	-	-	-	-	+	.	+	.	+	.	B1	155	EAEC	Og9+OgN4:Hg21		-	-	-	TEM-105*	-	-	-	-	-	-	-	-	-	-	-	-	-	-	mphB.v2_2176*	-	-
ECV534-2	ECV534-2	2013-10-10	6	DRR415737	5402887	169	300208	57.2683	f__Enterobacteriaceae	99.84	0.68	-	-	-	-	-	-	+	.	.	.	+	.	D	31	EAEC	Og130:Hg27		-	CTX-M-27_549	-	TEM-105*	aac3-IIa.v1_12*	-	-	aadA_93	-	-	-	-	-	ermB.v1_2136*	-	-	-	mphA_2174*?	mphB.v2_2176*?	catA1_2229*	-
ECV543-4	ECV543-4	2013-10-10	11	DRR415738	5403956	143	381393	38.7666	f__Enterobacteriaceae	99.97	1.16	-	-	-	-	-	-	+	.	.	.	+	.	D	31	EAEC	Og130:Hg27		-	CTX-M-55_578	-	TEM-105*	aac3-IIa.v1_12*	-	-	aadA_93	-	-	-	-	-	-	-	-	-	mphA_2174	mphB.v2_2176*?	catA1_2229*	-
ECV607-1	ECV607-1	2013-11-12	18	DRR415739	5398226	147	279308	35.0682	f__Enterobacteriaceae	99.38	1.11	-	-	-	-	-	-	+	.	.	.	+	.	D	31	EAEC	Og130:Hg27		-	CTX-M-55_578	-	TEM-105*	aac3-IIa.v1_12*	-	-	aadA_93	-	-	-	-	-	-	-	-	-	mphA_2174	mphB.v2_2176*?	catA1_2229*	-
ECV611-1	ECV611-1	2013-11-13	17	DRR415740	5762231	529	721631	36.7228	f__Enterobacteriaceae	99.08	4.48	-	-	-	-	-	-	+	.	.	.	.	.	G	457	EAEC	Og11:Hg25		-	CTX-M-27_549	-	-	-	-	-	aadA_93?	-	-	-	strA.v1_2409*	strB.v1_2410*	ermB.v1_2136*	-	-	-	mphA_2174	mphB.v2_2176*	-	-
ECV613-1	ECV613-1	2013-11-13	9	DRR415741	5326275	99	575057	65.7464	f__Enterobacteriaceae	99.95	0.04	-	-	-	-	-	-	+	.	+	.	+	.	D	414	EAEC	OgGp9:Hg18		-	CTX-M-14_625	-	-	-	-	-	-	-	-	-	-	-	-	-	-	-	-	mphB.v2_2176*?	catA1_2229*	-
ECV615-1	VNDC0615	2013-11-13	10	DRR415742	5507636	337	145584	69.4076	f__Enterobacteriaceae	99.56	0.1	-	-	-	+	-	-	-	.	.	.	.	.	B1	40	EPEC	Og51:Hg21	beta1	-	-	-	-	-	-	-	-	-	-	-	-	-	-	-	-	-	-	mphB.v2_2176*	-	-
ECV625-1	ECV625-1	2013-11-19	6	DRR415743	4785104	83	582711	73.0524	f__Enterobacteriaceae	99.37	0.04	-	-	-	+	-	-	-	.	.	.	.	.	B2	28	EPEC	Og173:Hg6	beta2	-	CTX-M-14_625*	-	TEM-105*	aac3-IId_16*	-	-	aadA5_114	-	-	-	strA.v1_2409*	strB.v1_2410*	-	-	-	-	mphA_2174	-	-	-
ECV626-1	ECV626-1	2013-11-19	18	DRR415744	5366155	112	898237	40.5573	f__Enterobacteriaceae	99.91	0.27	-	-	-	-	-	-	+	.	.	.	+	.	D	3032	EAEC	Og34:Hg27		-	CTX-M-55_578	-	TEM-105*	-	-	-	-	-	-	-	-	-	-	-	-	-	-	mphB.v2_2176*?	catA1_2229*	-
ECV628-1	ECV628-1	2013-11-19	55	DRR415745	5115398	93	721994	24.683	f__Enterobacteriaceae	99.67	0.53	-	-	-	-	-	-	+	.	.	.	.	.	F	457	EAEC	Og11:Hg25		-	CTX-M-27_549	-	-	-	-	-	aadA5_114	-	-	-	strA.v1_2409*	strB.v1_2410*	ermB.v1_2136*	-	-	-	mphA_2174	mphB.v2_2176*	-	-
ECV630-1	ECV630-1	2013-11-20	24	DRR415746	4922495	88	553837	28.5359	f__Enterobacteriaceae	99.62	0.35	-	-	-	+	-	-	-	.	.	.	.	.	B1	40	EPEC	Og51:Hg21	beta1	-	-	-	-	-	-	-	-	-	-	-	-	-	-	-	-	-	-	mphB.v2_2176*	-	-
ECV631-3	ECV631-3	2013-11-20	12	DRR415747	4915515	84	423215	40.3189	f__Enterobacteriaceae	99.62	0.1	-	-	-	+	-	-	-	.	.	.	.	.	B1	40	EPEC	Og51:Hg21	beta1	-	-	-	-	-	-	-	-	-	-	-	-	-	-	-	-	-	-	mphB.v2_2176*	-	-
ECV659-2	ECV659-2	2013-12-03	7	DRR415748	5223507	117	484825	74.0046	f__Enterobacteriaceae	99.62	0.58	-	-	-	+	-	-	-	.	+	.	.	.	B1	40	EPEC	OgX18:Hg21	theta	-	-	-	-	-	-	-	-	-	-	-	-	-	-	-	-	-	-	mphB.v2_2176*	-	-
ECV820-5	ECV820-5	2014-02-20	32	DRR415749	4958435	136	443073	50.5009	f__Enterobacteriaceae	97.78	0.47	-	-	-	+	-	-	-	.	.	.	.	+	albertii	4606	-	EAOg1:HgUT	sigma	-	-	-	-	-	-	-	-	-	-	-	strA.v1_2409*	strB.v1_2410*	-	-	-	-	-	-	-	-
ECV778-1	ECV778-1	2014-04-04	9	DRR415750	5046171	132	443048	39.4427	f__Enterobacteriaceae	98.54	0.39	-	-	-	+	-	-	-	.	.	.	.	+	albertii	4606	-	EAOg1:HgUT	sigma	-	-	-	TEM-105*	-	-	-	-	-	-	-	strA.v1_2409*	strB.v1_2410*	-	-	-	-	-	-	-	-
ECV802-1	ECV802-1	2014-04-23	16	DRR415751	5030811	130	442998	33.8766	f__Enterobacteriaceae	98.53	0.49	-	-	-	+	-	-	-	.	.	.	.	+	albertii	4606	-	EAOg1:HgUT	sigma	-	-	-	TEM-105*	-	-	-	-	-	-	-	strA.v1_2409*	strB.v1_2410*	-	-	-	-	-	-	-	-
ECV853-1	ECV853-1	2014-06-12	21	DRR415752	5367497	94	610337	32.4557	f__Enterobacteriaceae	99.95	0.07	-	-	-	-	-	-	+	.	+	.	+	.	D	414	EAEC	OgGp9:Hg18		-	CTX-M-27_549	-	-	-	-	-	-	-	-	-	-	-	-	-	-	-	-	mphB.v2_2176*?	catA1_2229*	-
ECV852-5	ECV852-5	2014-06-18	13	DRR415753	4808288	96	671442	43.9443	f__Enterobacteriaceae	99.7	0.2	-	-	-	-	-	-	+	.	.	.	.	.	A	484	EAEC	Og7:Hg4		CMY-2.v2_399	-	-	TEM-105*	-	-	-	-	-	-	-	strA.v1_2409*	strB.v1_2410*	-	-	-	-	-	mphB.v2_2176*	-	-
ECV890-1	ECV890-1	2014-07-08	6	DRR415754	5386184	124	957193	47.6446	f__Enterobacteriaceae	99.97	0.1	-	-	-	-	-	-	+	.	.	.	+	.	D	1380	EAEC	OgGp9:Hg18		-	CTX-M-27_549	-	-	-	-	-	aadA5_114	-	-	-	-	-	ermB.v1_2136*	-	-	-	mphA_2174	mphB.v2_2176*	-	-
ECV865-1	ECV865-1	2014-08-12	16	DRR415755	5050009	230	199542	35.1837	f__Enterobacteriaceae	99.87	0.14	-	-	-	+	-	-	-	.	.	.	.	.	A	34	EPEC	Og101:Hg33	lambda	-	CTX-M-15_530	OXA-1_999	-	aac3-IIa.v1_12*	aac6'-Ib-cr.v2_48	-	aadA5_114	-	-	-	strA.v1_2409*	-	-	-	-	-	mphA_2174*	mphB.v2_2176*	-	CatB4.v1_2412
ECV896-2	ECV896-2	2014-09-10	5	DRR415756	5196511	121	309185	44.2311	f__Enterobacteriaceae	99.62	0.33	-	-	-	-	-	-	+	.	+	.	+	.	B1	200	EAEC	Og175:Hg31		CMY-2.v2_399	-	-	TEM-105*	-	-	-	aadA5_114	-	-	-	-	-	-	-	-	-	mphA_2174	mphB.v2_2176*	-	-
ECV915-2	ECV915-2	2014-10-15	15	DRR415757	5003686	94	437334	36.1003	f__Enterobacteriaceae	99.62	0.1	-	-	-	-	-	-	+	+	+	.	+	.	A	10	EAEC	Og3:Hg2		-	-	-	TEM-105*	aac3-IId_16*	-	-	-	-	-	-	strA.v1_2409*	strB.v1_2410*?	ermB.v1_2136*?	-	-	-	mphA_2174*	mphB.v2_2176*	-	-
ECV939-2	VNDC0939	2014-11-26	2	DRR415758	4985218	355	143600	90.0932	f__Enterobacteriaceae	99.07	0.04	-	-	-	+	-	-	-	.	.	.	.	.	E	6272	EPEC	Og138:Hg48	eta2	-	-	-	-	-	-	-	-	-	-	-	-	-	-	-	-	-	-	mphB.v2_2176*	-	-
ECV945-4	ECV945-4	2014-12-01	9	DRR415759	5248269	161	339185	41.9605	f__Enterobacteriaceae	95.67	0.38	-	-	-	+	-	-	-	.	.	.	.	+	albertii	4633?	-	Og181:HgUT	epsilon3	-	CTX-M-65_591*?	OXA-10_1000?	TEM-104	aac3-IV_21?	-	-	aadA2_104	aph3-Ia.v1_165*?	aph4-Ia_166?	-	strA.v1_2409*	strB.v1_2410*	-	linG_2160*?	lnuF.v1_2165*?	-	-	-	-	-
ECV956-1	ECV956-1	2014-12-15	7	DRR415760	5373505	90	706207	33.1574	f__Enterobacteriaceae	99.62	0.22	-	-	-	-	-	-	+	.	+	.	+	.	D	414	EAEC	OgGp9:Hg18		-	CTX-M-27_549	-	-	-	-	-	-	-	-	-	-	-	-	-	-	-	-	mphB.v2_2176*?	catA1_2229*	-
ECV958-2	VNDC0958	2014-12-16	9	DRR415761	4998558	100	374479	74.9919	f__Enterobacteriaceae	99.97	0.62	-	-	-	-	-	-	+	.	.	.	+	.	D	31	EAEC	Og130:Hg27		-	-	-	TEM-105*	aac3-IIa.v1_12*	-	-	aadA5_114	-	-	-	-	-	-	-	-	-	mphA_2174	mphB.v2_2176*?	catA1_2229*	-
ECV960-1	ECV960-1	2014-12-16	4	DRR415762	5557719	182	452310	40.6689	f__Enterobacteriaceae	99.59	0.53	-	-	-	+	-	-	-	.	+	.	.	.	B1	3	EPEC	Og128:Hg2	beta1	-	CTX-M-27_549	-	TEM-105*	aac3-IId_16*	-	-	aadA5_114	-	-	-	strA.v1_2409*	strB.v1_2410*	ermB.v1_2136*	-	-	-	mphA_2174	mphB.v2_2176*?	-	-
ECV970-2	ECV970-2	2014-12-22	12	DRR415763	5037920	78	479306	38.5173	f__Enterobacteriaceae	99.67	0.45	-	-	-	-	-	-	+	.	.	.	.	.	A	34	EAEC	Og99:Hg10		-	CTX-M-27_549	-	TEM-105*	-	-	-	-	-	-	-	strA.v1_2409*	strB.v1_2410	ermB.v1_2136*	-	-	-	mphA_2174	mphB.v2_2176*	-	-
ECV998-1	ECV998-1	2015-01-06	26	DRR415764	5005894	83	437137	42.3409	f__Enterobacteriaceae	99.62	0.1	-	-	-	-	-	-	+	+	+	.	+	.	A	10	EAEC	Og3:Hg2		-	-	-	TEM-105*	aac3-IId_16*	-	-	-	-	-	-	strA.v1_2409*	strB.v1_2410*	ermB.v1_2136*?	-	-	-	mphA_2174*	mphB.v2_2176*	-	-
ECV1007-1	ECV1007-1	2015-01-13	5	DRR415765	5041336	123	504903	40.0818	f__Enterobacteriaceae	99.93	0.26	-	-	-	-	-	-	+	.	+	.	+	.	B1	2178	EAEC	Og39:Hg49		CMY-42_479*	-	-	TEM-105*	aac3-IId_16*	-	-	aadA5_114	-	-	-	-	-	-	-	-	-	mphA_2174	mphB.v2_2176*?	-	-
ECV1009-1	VNDC1009	2015-01-13	36	DRR415766	4896591	174	250905	77.2802	f__Enterobacteriaceae	99.97	0.33	-	-	-	+	-	-	-	.	.	.	.	.	B2	2346	EPEC	Og142:Hg34	alpha1	-	-	-	-	-	-	-	-	-	-	-	-	-	-	-	-	-	-	-	-	-
ECV1020.1	VNDC1020	2015-01-21	6	DRR415767	5060231	294	137723	79.1044	f__Enterobacteriaceae	99.62	0.32	-	-	-	-	-	-	+	.	+	.	.	.	D	68	EAEC	Og99:Hg6		CMY-42_479	-	-	TEM-105*	aac3-IId_16*	-	-	aadA22_106	-	-	-	-	-	-	-	-	-	mphA_2174	mphB.v2_2176*?	-	-
ECV1022.1	VNDC1022	2015-01-21	10	DRR415768	4918829	89	446426	70.3571	f__Enterobacteriaceae	99.97	0.1	-	-	-	+	-	-	-	.	.	.	.	.	B2	4060	EPEC	Og157:Hg39	kappa	-	CTX-M-27_549	-	-	-	-	-	aadA5_114	-	-	-	strA.v1_2409*	strB.v1_2410	ermB.v1_2136*	-	-	-	mphA_2174	-	-	-
ECV1024.1	VNDC1024	2015-01-21	11	DRR415769	5227860	210	199910	57.5331	f__Enterobacteriaceae	99.37	0.1	-	-	-	+	-	-	-	.	.	.	.	.	B2	4060	EPEC	Og157:Hg39	kappa	-	CTX-M-27_549	-	-	-	-	-	aadA5_114	-	-	-	strA.v1_2409*	strB.v1_2410	ermB.v1_2136*	-	-	-	mphA_2174	-	-	-
Sequence type
*Query sequence contained a single base mismatch with the reference sequence
?Query sequence did not have 100% overlap compared to reference sequence
UT; untypeable
DNA-based serotyping
OgGp5 is a group consisting of O123 and O186
OgGp7 is a group consisting of O2 and O50
OgGp9 is a group consisting of O17, O44, O73, O77 and O106
UT; untypeable
Antimicrobial resistance genes
*Query sequence was not 100% identity to the reference sequence
?Query sequence did not have 100% overlap compared to reference sequence
Gray boxes indicate genes that could not be detected by analysis using the assembled sequences shown in Table S3. These genes are negative in Figure 1.
[truncated: 10 more columns]
